# Supplementary figures and images for: Pre-Emptive Use of Rituximab in Epstein–Barr Virus Reactivation: Incidence, Predictive Factors, Monitoring, and Outcomes
Source: MDPI journal article supplement (doi:10.3390/ijms242216029), 2023-11-07

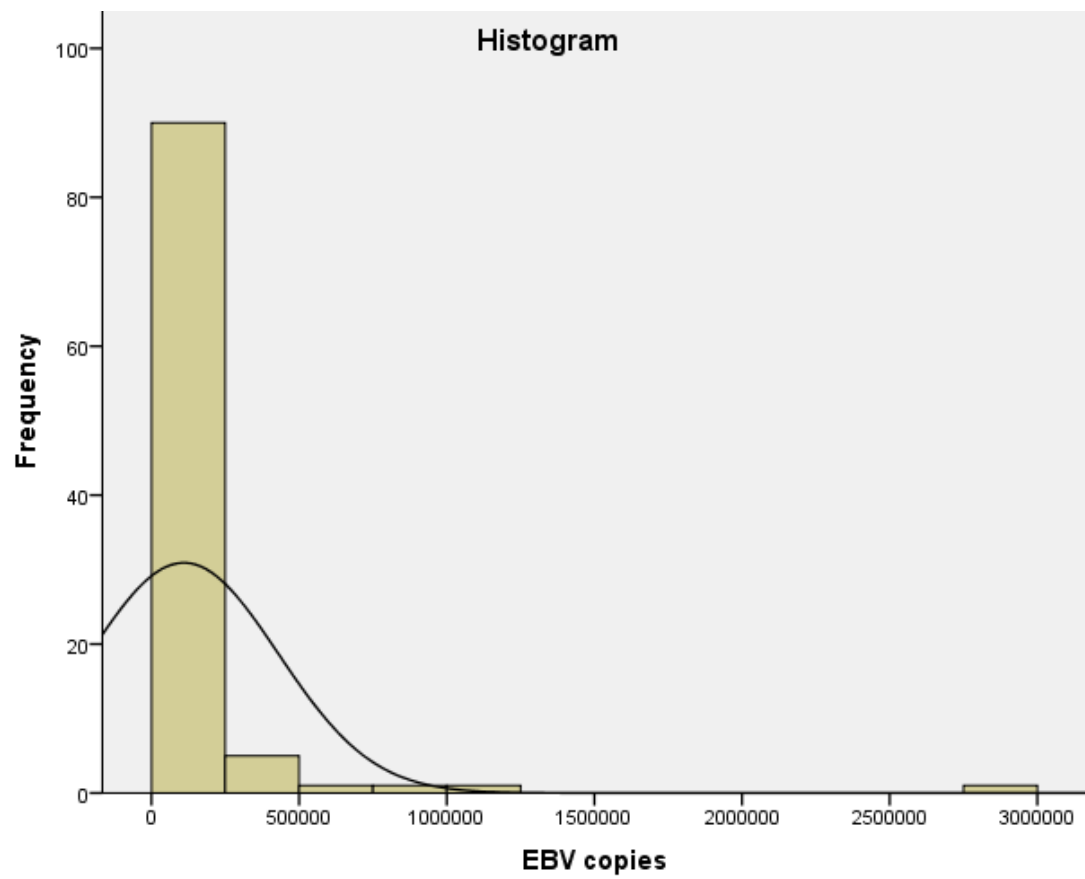

**Figure S1:** EBV copies frequency distribution plot.

Supplement: s1 [file s1]

**Supplemental Figure S5.** Cumulative incidence of treatment-related mortality

(TRM) in months.

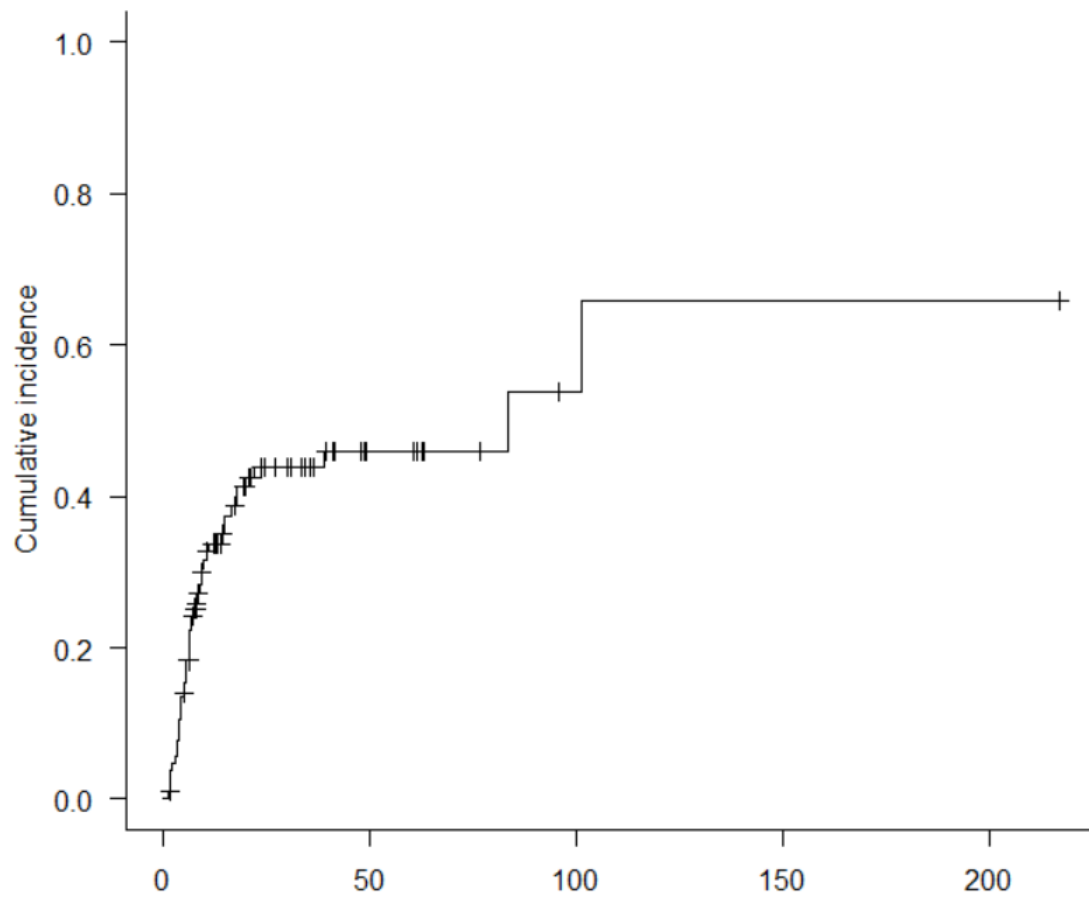

Supplement: s1 [file s1]

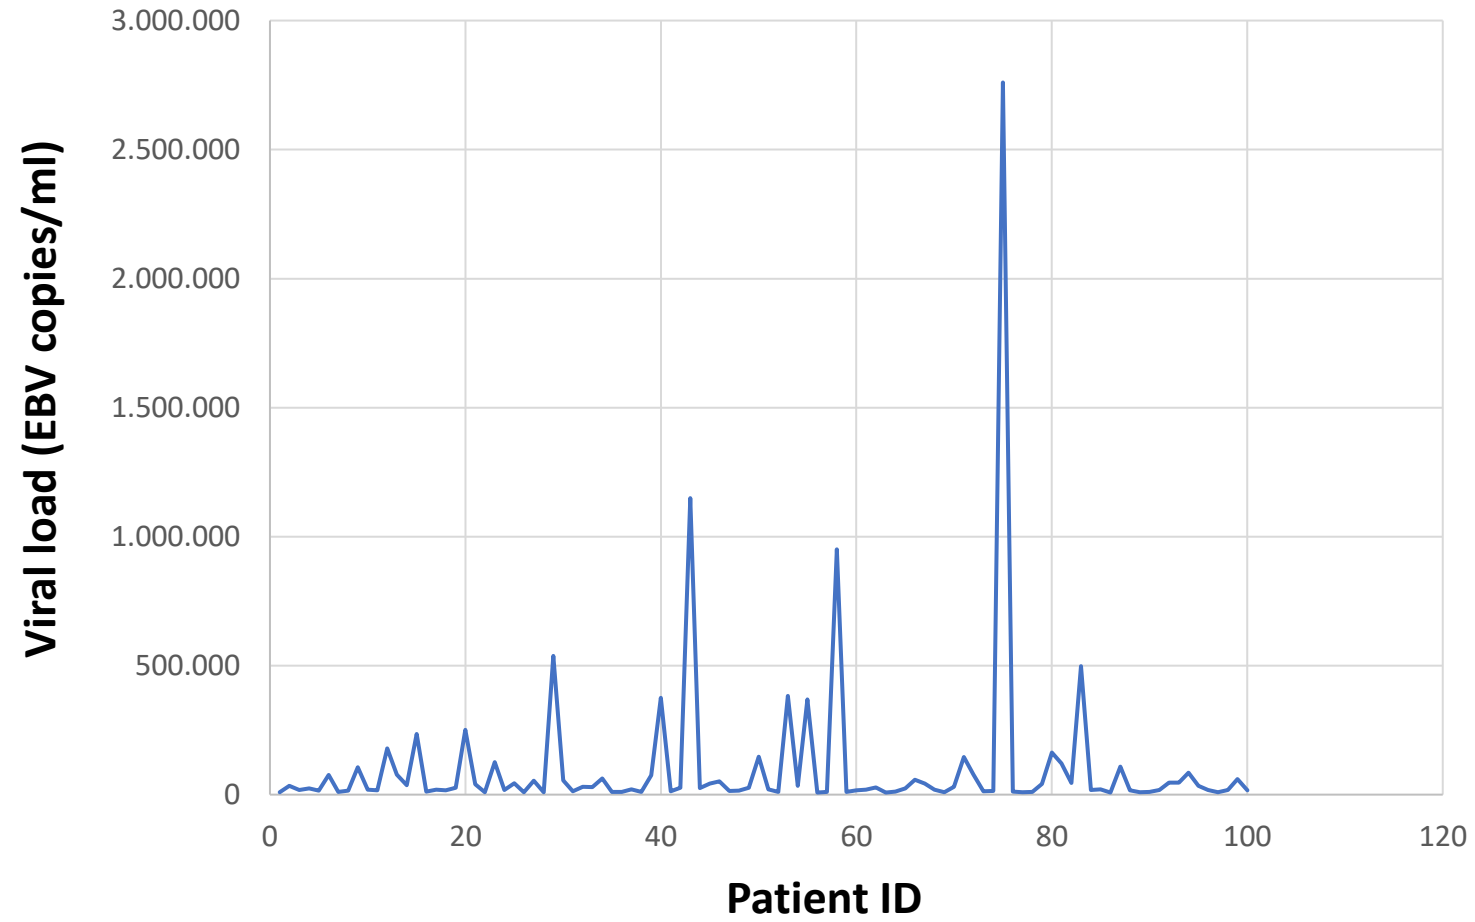

**Figure S3.** Scatter plot for EBV copies/ml before treatment per patient.

Supplement: s1 [file s1]

**Supplemental Figure S4.** Kaplan-Meier curve for relapse-free (RFS, A) and overall survival (OS, B).

A.

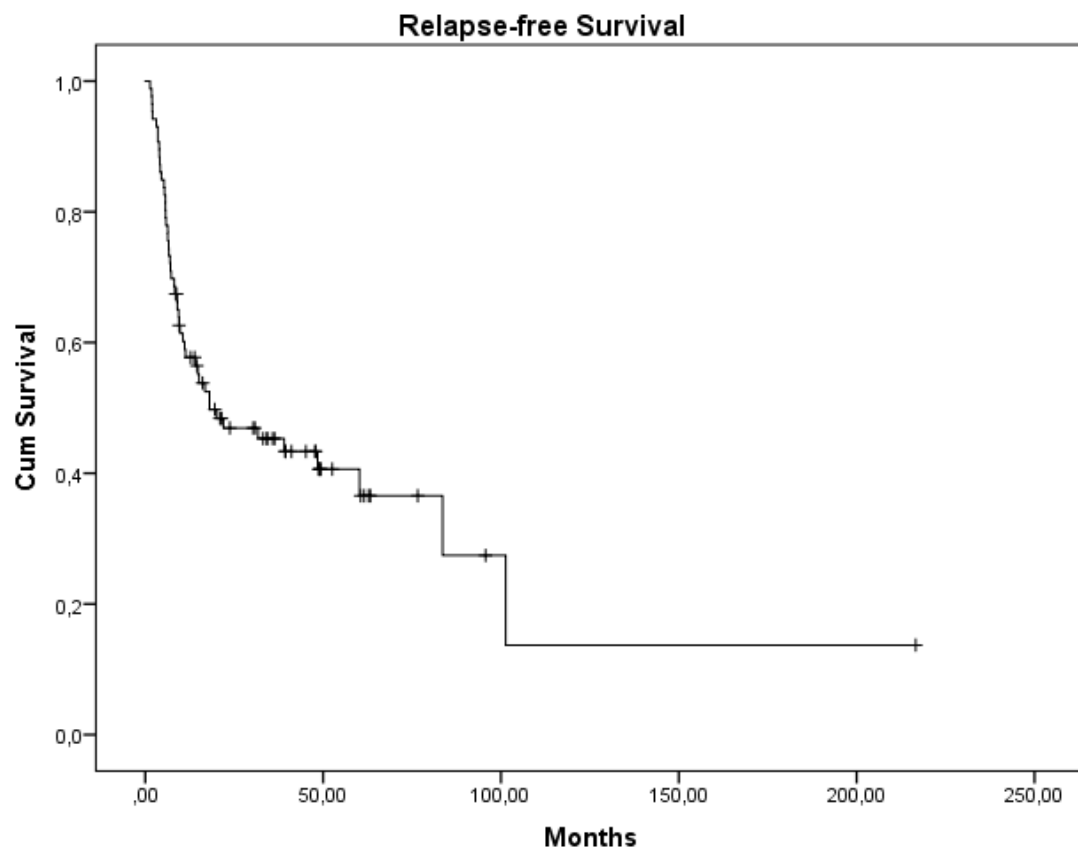

B.

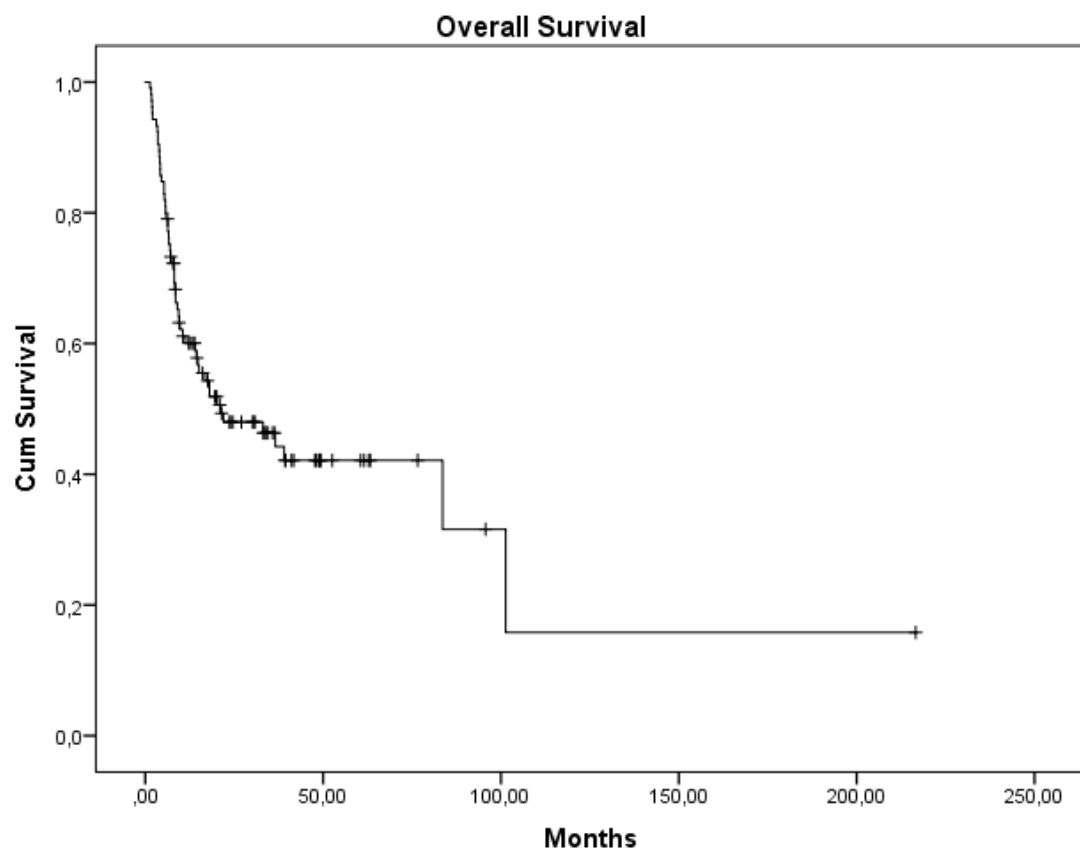

Supplement: s1 [file s1]

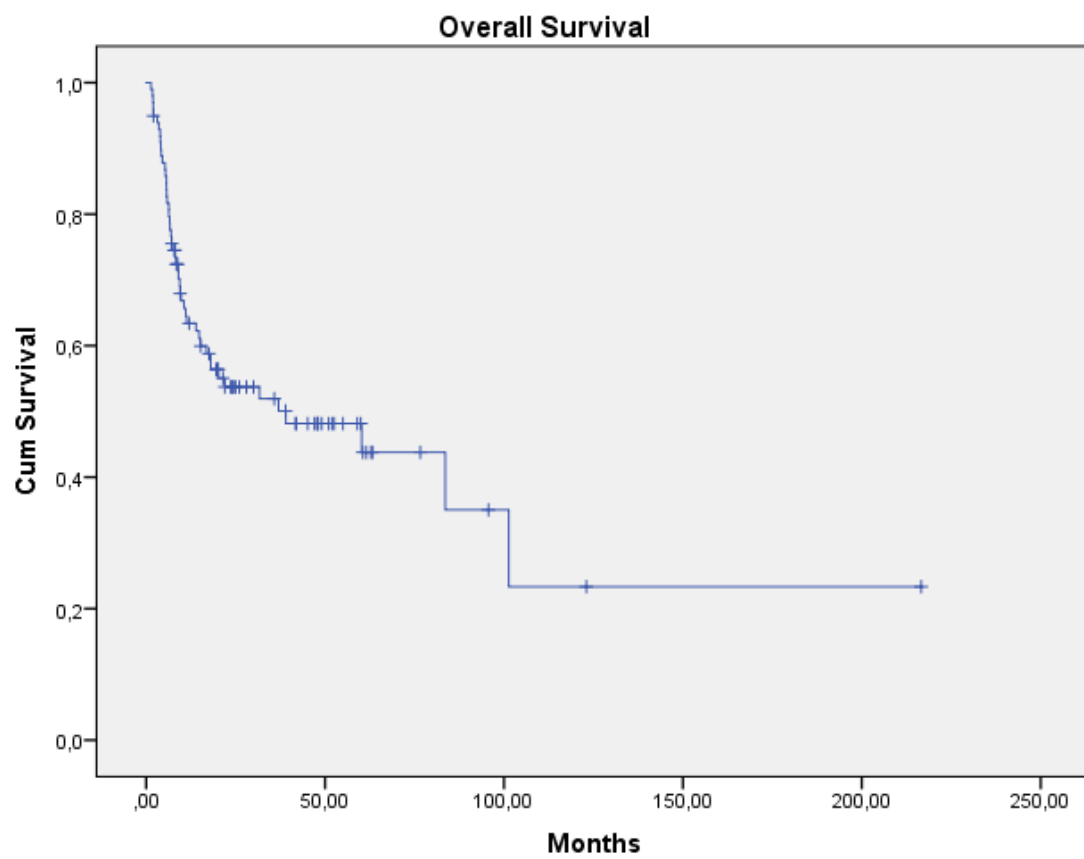

**Figure S2:** COX regression analysis.

Supplement: s1 [file s1]
